# Supplementary material for: Tailoring the shape and size of wet-chemical synthesized FePt nanoparticles by controlling nucleation and growth with a high magnetic field
Source: Royal Society of Chemistry journal article supplement (doi:10.1039/c9nr04565a), 2019-01-01
Supplement: c9nr04565a1.pdf [file c9nr04565a1.pdf]

## Electric Supplementary Information

### Tailoring the shape and size of wet-chemical synthesized FePt nanoparticles by controlling nucleation and growth with high magnetic field

Chun Wu <sup>a,b,†</sup>, Xiaoyang Wang <sup>a,†</sup>, Wenli Pei <sup>\*c</sup>, Dong Zhao <sup>c</sup>, Kai Wang <sup>a</sup>, Guojian Li <sup>a</sup>, and  
Qiang Wang <sup>\*a</sup>

a. Key Laboratory of Electromagnetic Processing of Materials (Ministry of Education), Northeastern University, Shenyang 110819, People's Republic of China.

E-mail: wangq@mail.neu.edu.cn.

b. School of Materials Science and Engineering, Liaoning Technical University, Fuxin 123000, People's Republic of China.

c. Key Laboratory of Anisotropy and Texture of Materials (Ministry of Education), Northeastern University, Shenyang 110819, People's Republic of China.

E-mail: peiwl@atm.neu.edu.cn.

† Chun Wu and Xiaoyang Wang contributed equally to this work.

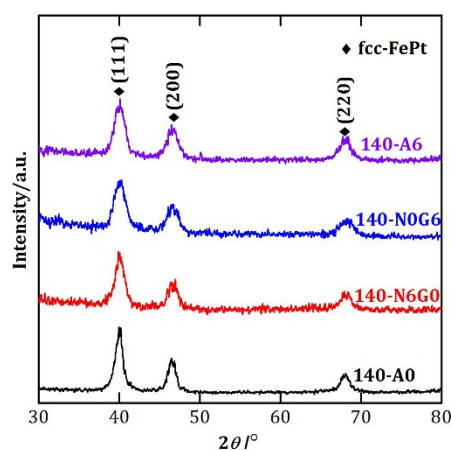

Fig S1 XRD patterns of FePt nanoparticles synthesized at various conditions (extending one-hour at 140°C).

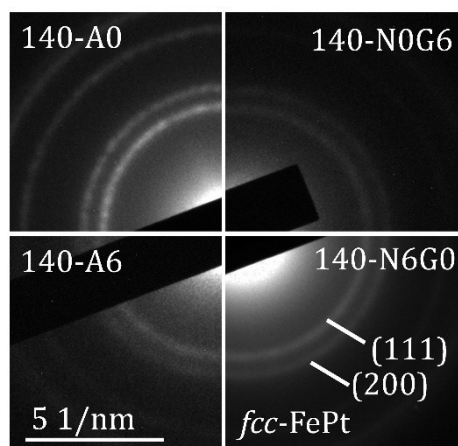

Fig S2 SAED images of FePt nanoparticles synthesized at various conditions (extending one-hour at 140°C).
